# Supplementary material for: Synthesis of a multi-functionalized NiCo2O4 spinel heterostructure via the hydrothermal route for high-performance photo-electrocatalytic, anti-bacterial and eco-toxicity applications
Source: Royal Society of Chemistry journal article supplement (doi:10.1039/d2nj05422a), 2022-11-15
Supplement: d2nj05422a1.pdf [file d2nj05422a1.pdf]

### Electronic Supplementary Information (ESI)

## Multi-functionalized NiCo<sub>2</sub>O<sub>4</sub> spinel heterostructure by hydrothermal route for high performance photo-electrocatalytic, anti-bacterial and eco-toxicity applications

C. Sakthivel<sup>a</sup>, A. Nivetha<sup>a</sup>, Govindhan Thirupathi<sup>b</sup>, Palanisamy Sundararaj<sup>b</sup> and I. Prabha<sup>a,\*</sup>

<sup>a,\*</sup>Department of Chemistry, Bharathiar University, Coimbatore, Tamil Nadu, India - 641 046

<sup>b</sup>Department of Zoology, Bharathiar University, Coimbatore, Tamilnadu 641046, India

Corresponding author email: iprabha2007@gmail.com

Journal in which to be published: New Journal of Chemistry

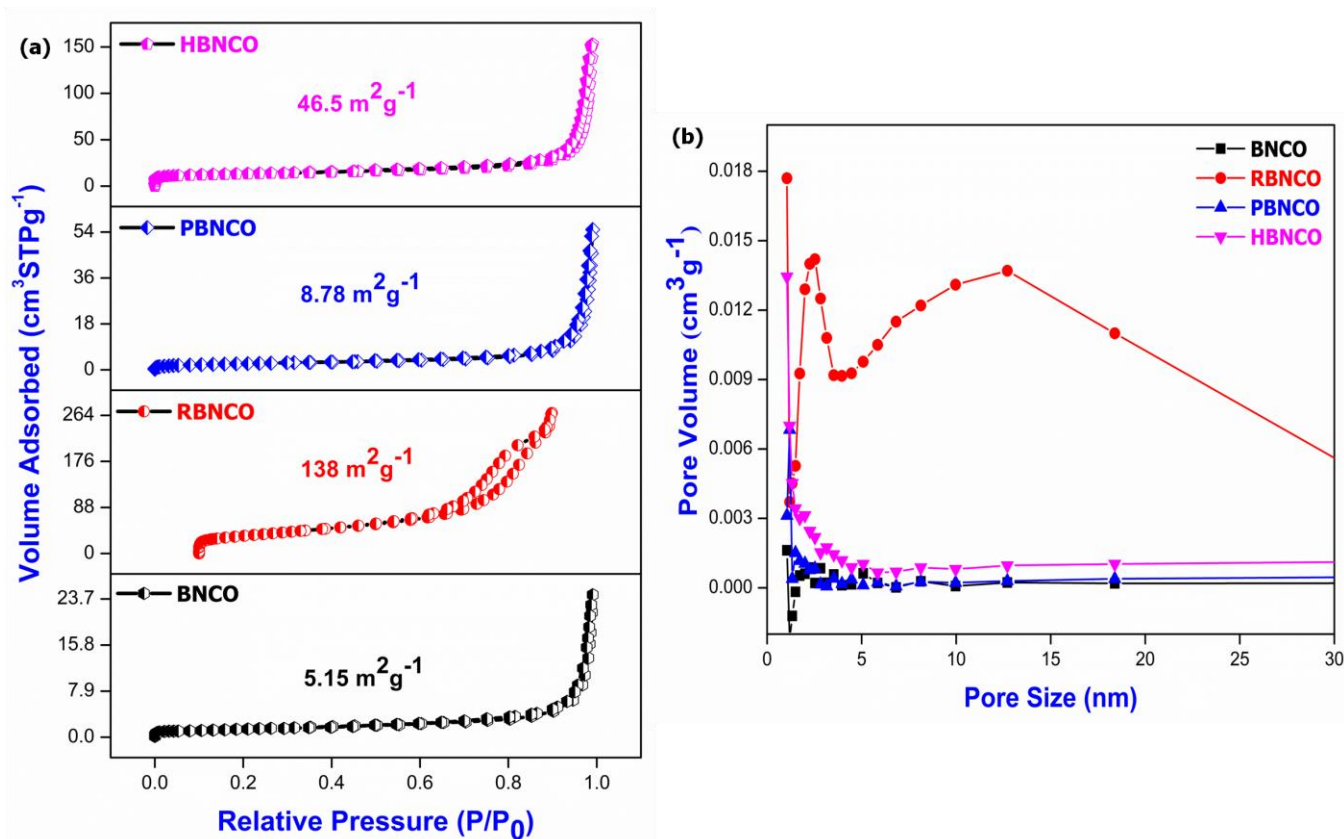

Figure S1 (a) N<sub>2</sub> Adsorption/Desorption isotherms and (b) BJH plots of nanocomposites

Table S1 Surface properties of synthesized nanocomposites

| S. No | Material | BET specific surface area (m <sup>2</sup> /g <sup>-1</sup> ) | Pore volume (cm <sup>3</sup> /g <sup>-1</sup> ) | Pore size (nm) | DLS                |       |                     |                               |                           |
|-------|----------|--------------------------------------------------------------|-------------------------------------------------|----------------|--------------------|-------|---------------------|-------------------------------|---------------------------|
|       |          |                                                              |                                                 |                | Particle size (nm) | PDI   | Zeta potential (mV) | Dispersant & refractive index | Sample preparation method |
| 1     | BNCO     | 5.15                                                         | 0.0343                                          | 28.848         | 252.7 ± 1.9        | 0.466 | -35.9               | Water (1.333)                 | Ultra-sonication          |
| 2     | RBNCO    | 138.0                                                        | 0.405                                           | 10.614         | 242.5 ± 1.2        | 0.522 | -35.6               |                               |                           |
| 3     | PBNCO    | 8.78                                                         | 0.0788                                          | 23.692         | 257.1 ± 3.6        | 0.766 | -32.8               |                               |                           |
| 4     | HBNCO    | 46.5                                                         | 0.2144                                          | 21.101         | 248.5 ± 2.3        | 0.529 | -34.9               |                               |                           |

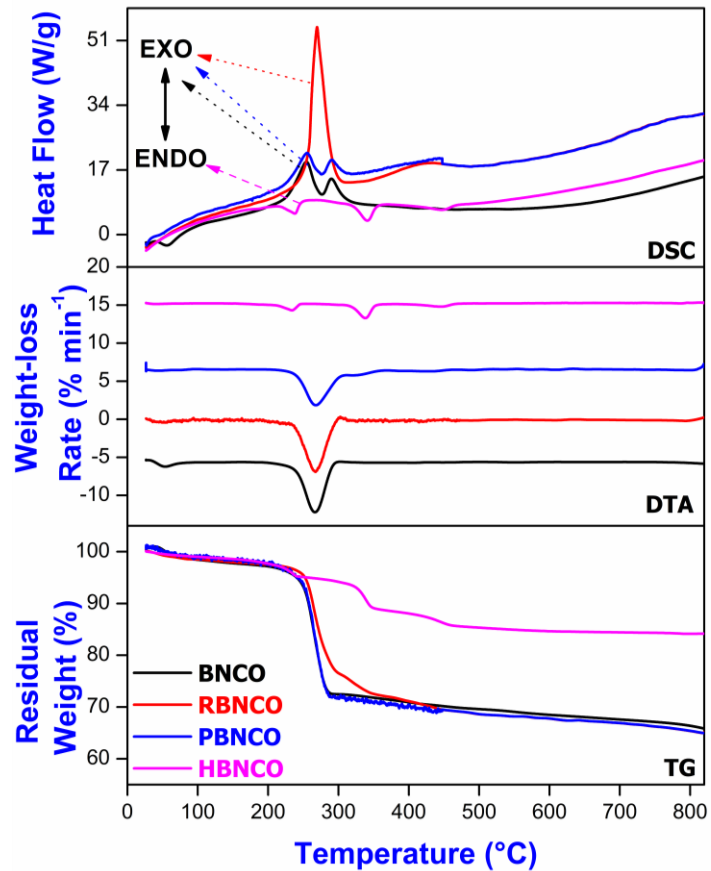

Figure S2 TG/DTA of synthesized mixed oxide catalysts

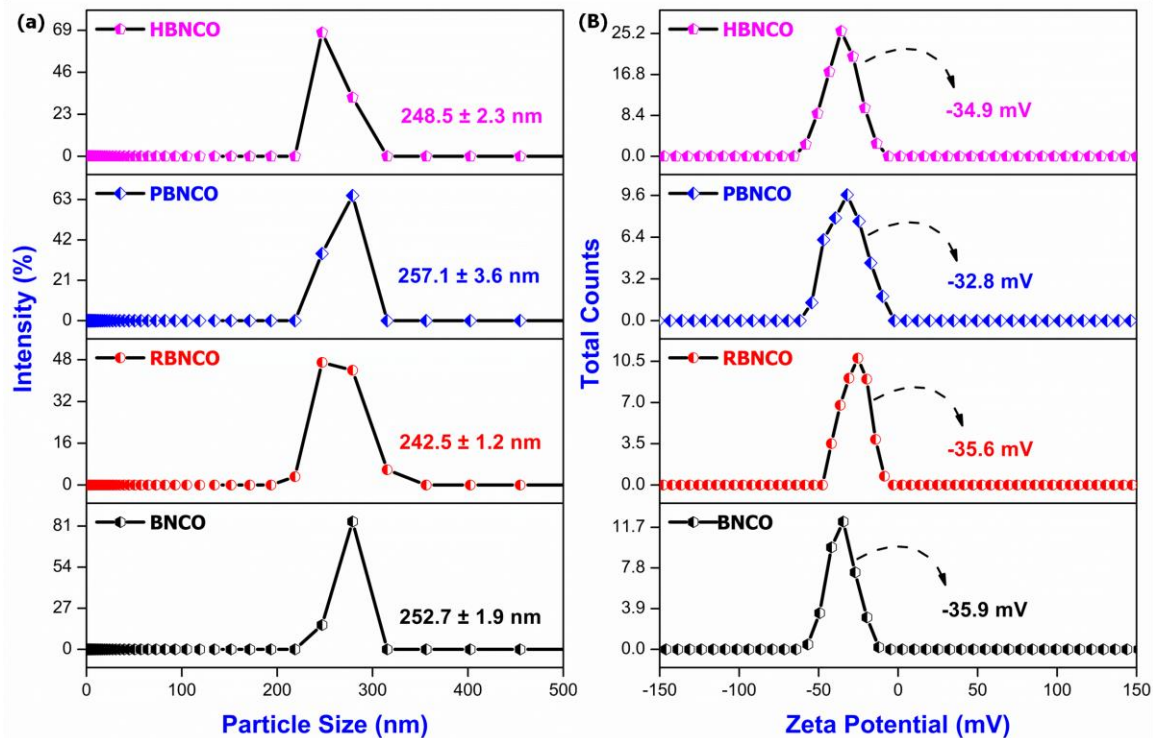

Figure S3 (a) Hydrodynamic particle size and (b) Zeta potential of nanocomposites

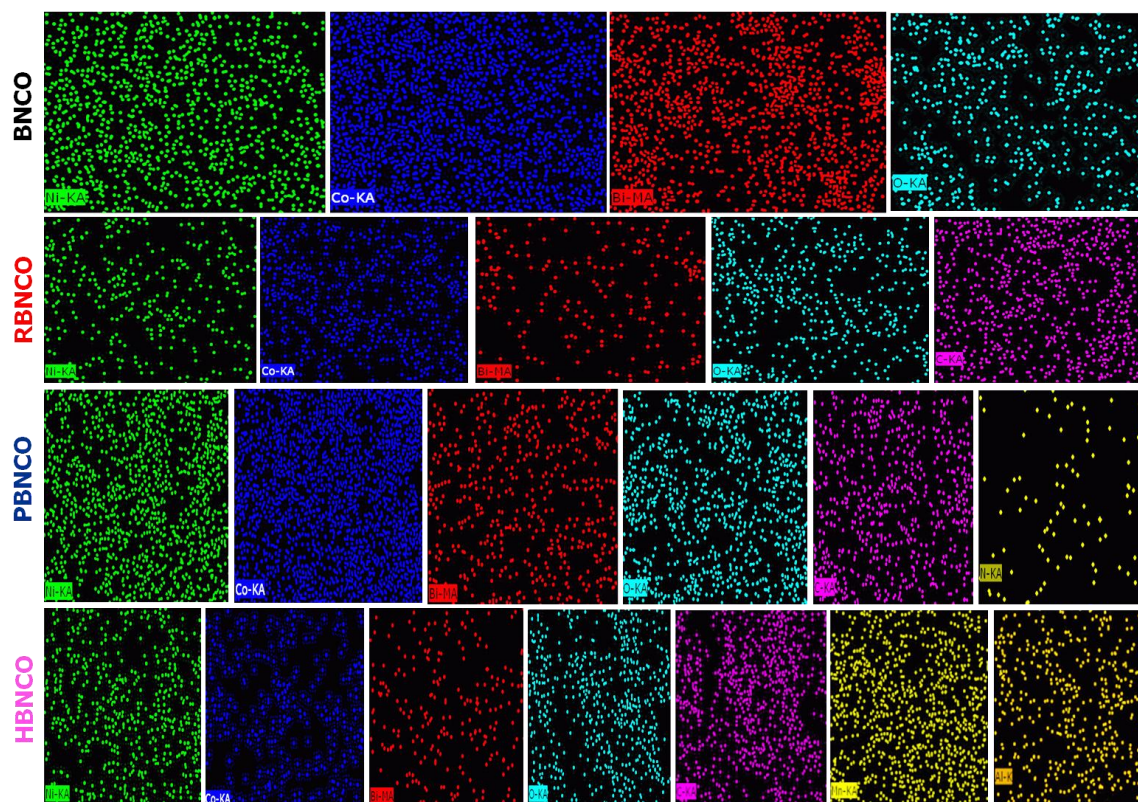

Figure S4 Elemental mapping of composites

Table S2 Electrochemical measurements for mixed composites

| S. No | Material | Overpotential ( $\eta$ ) (mV) at $10 \text{ mA cm}^{-2}$ | Tafel slop ( $\text{mV dec}^{-1}$ ) | $C_{dl}$ ( $\mu\text{F cm}^{-2}$ ) | ECSA ( $\text{cm}^2$ ) | $R_{ct}$ ( $\Omega$ ) | TOF $\text{s}^{-1}$ |
|-------|----------|----------------------------------------------------------|-------------------------------------|------------------------------------|------------------------|-----------------------|---------------------|
| 1.    | BNCO     | 377                                                      | 81                                  | 9.457                              | 0.2364                 | 3.75                  | 0.0343              |
| 2.    | RBNCO    | 329                                                      | 66                                  | 18.391                             | 0.4597                 | 2.80                  | 0.5030              |
| 3.    | PBNCO    | 450                                                      | 122                                 | 14.251                             | 0.3562                 | 4.06                  | 0.0196              |
| 4.    | HBNC0    | 360                                                      | 73                                  | 14.679                             | 0.3669                 | 3.25                  | 0.1372              |

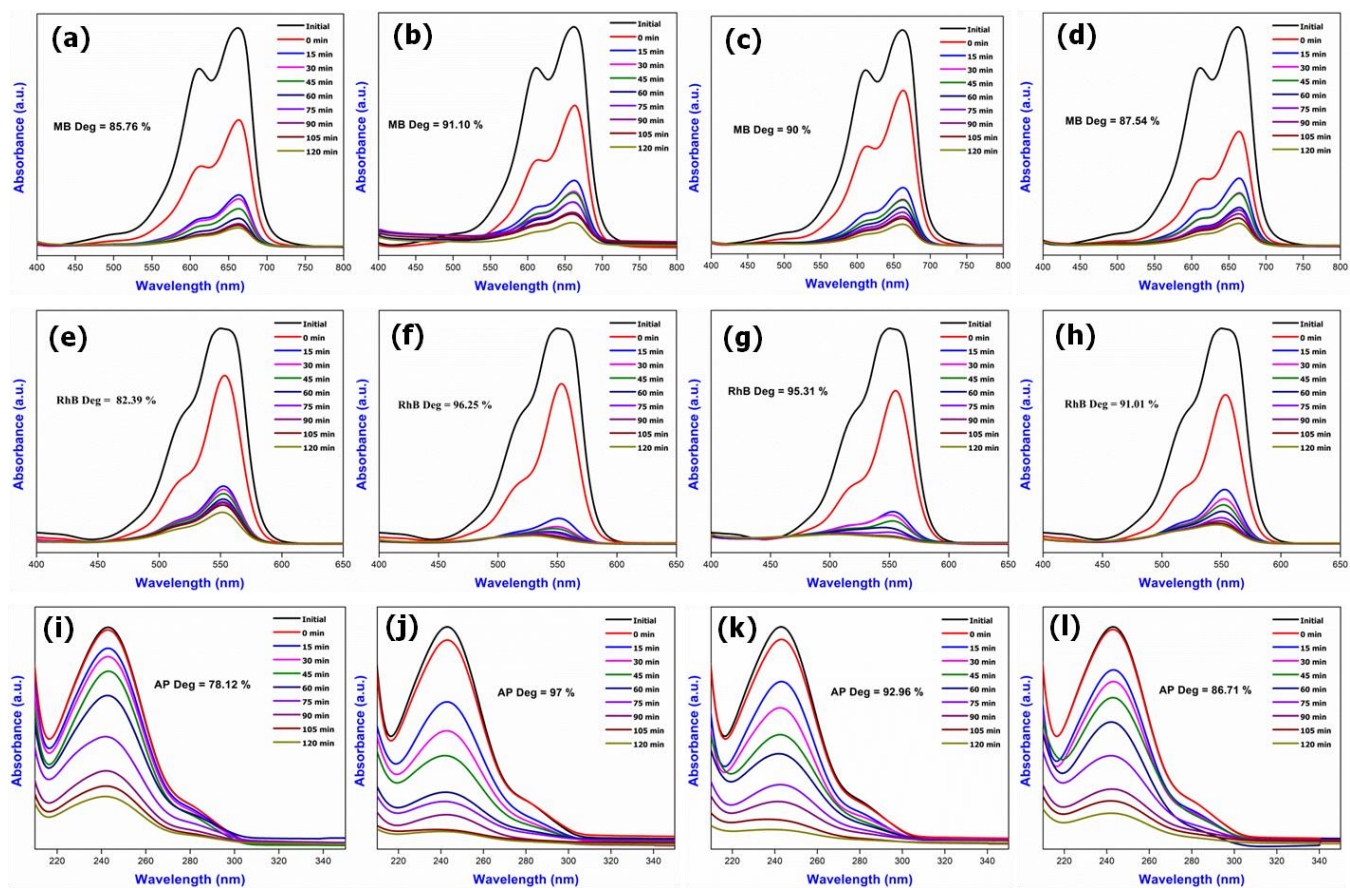

Figure 5S shows UV graphs for photocatalytic degradation of (a-d) MB, (e-h) RhB and (i-l) AP using four composites of BNCO, RBNCO, PBNCO and HBNC0 NCS

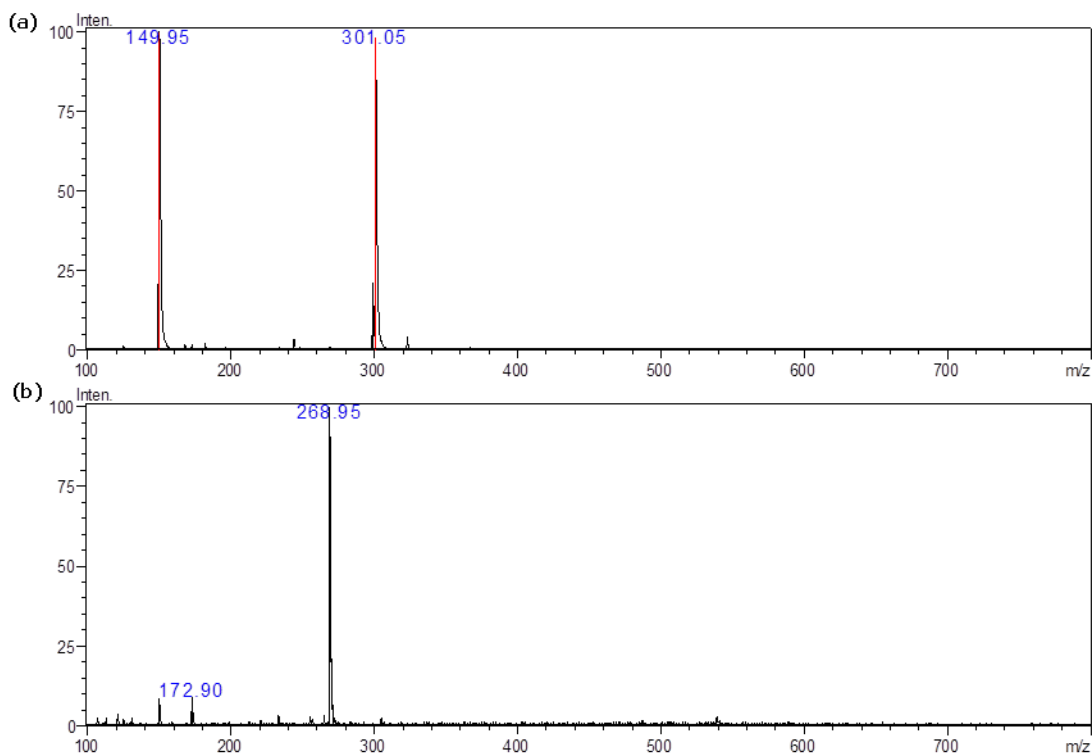

Figure S6 LC-MS analysis of (a) Before and (b) After the photocatalytic treatment of acetaminophene drug

Table S3 Rate constant and  $R^2$  values for photocatalysts

| S. No | Materials | Pseudo-first-order kinetic model    |             |                                     |             |                                     |             |
|-------|-----------|-------------------------------------|-------------|-------------------------------------|-------------|-------------------------------------|-------------|
|       |           | MB                                  |             | RhB                                 |             | Acetaminophene                      |             |
|       |           | Rate constant ( $\text{min}^{-1}$ ) | $R^2$ value | Rate constant ( $\text{min}^{-1}$ ) | $R^2$ value | Rate constant ( $\text{min}^{-1}$ ) | $R^2$ value |
| 1.    | BNCO      | 0.01243                             | 0.8557      | 0.01122                             | 0.7192      | 0.01108                             | 0.8500      |
| 2.    | RBNCO     | 0.01583                             | 0.8975      | 0.02198                             | 0.8801      | 0.02286                             | 0.9424      |
| 3.    | PBNCO     | 0.01454                             | 0.8765      | 0.02139                             | 0.8404      | 0.01869                             | 0.9169      |
| 4.    | HBNCO     | 0.01314                             | 0.806       | 0.0161                              | 0.7671      | 0.01445                             | 0.8819      |

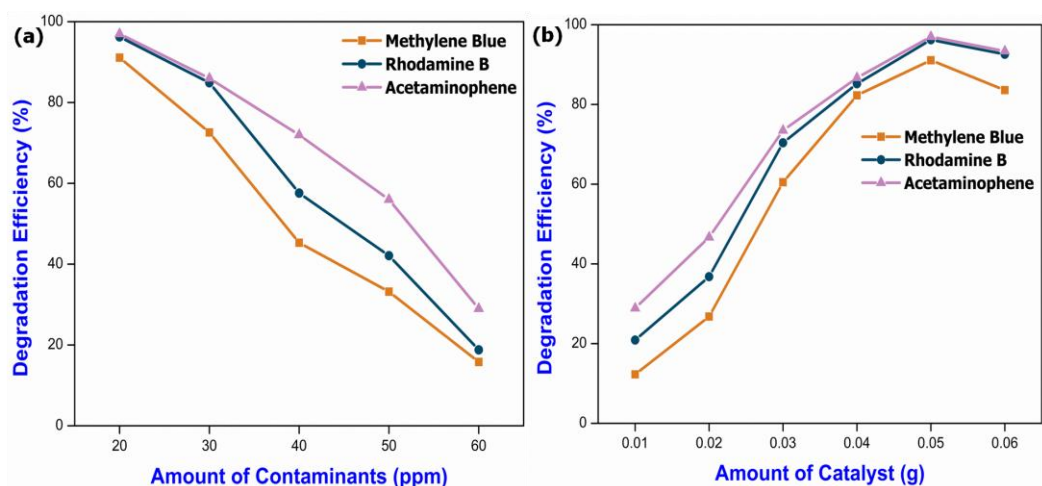

Figure S7 (a) Effect of concentration, (b) Effect of catalyst dosage on photocatalytic degradation efficiency using RGO@Bi<sub>2</sub>O<sub>3</sub>/NiCo<sub>2</sub>O<sub>4</sub> NCs

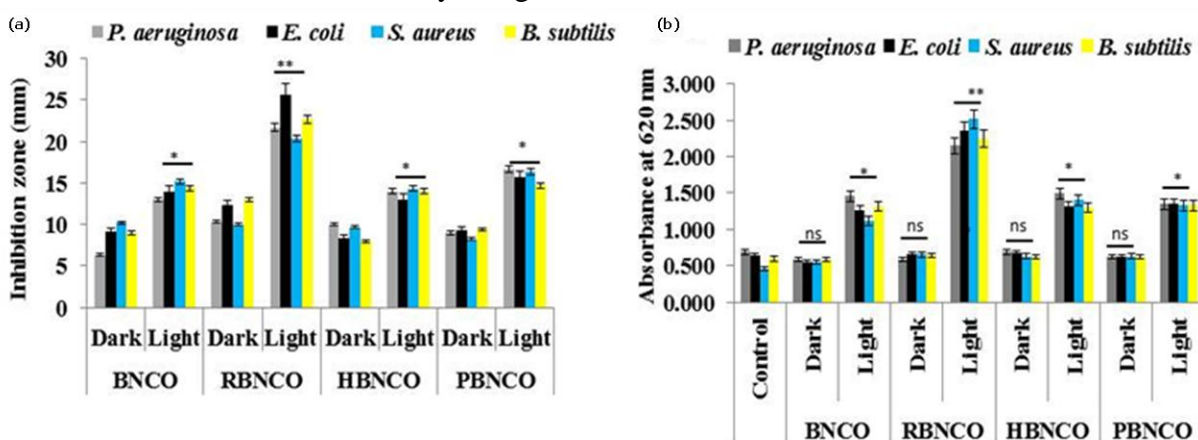

Figure S8 Bar graphs of (a) zone of inhibition and (b) ROS production induced by nanocomposites in selected bacterial strains. \*\* p < 0.01 vs. dark, ns-not significant Vs. control

Table S4 Minimum Inhibitory Concentrations (MICs;  $\mu\text{g mL}^{-1}$ ) and Minimum Bactericidal Concentrations (MBCs;  $\mu\text{g mL}^{-1}$ ) of nanocomposites

| Nanocomposite | Condition | <i>B. subtilis</i> |     | <i>S. aureus</i> |     | <i>E. coli</i> |     | <i>P. aeruginosa</i> |     |
|---------------|-----------|--------------------|-----|------------------|-----|----------------|-----|----------------------|-----|
|               |           | MIC                | MBC | MIC              | MBC | MIC            | MBC | MIC                  | MBC |
| RBNCO         | Dark      | 14                 | 17  | 13               | 15  | 114            | 14  | 16                   | 14  |
|               | Light     | 24                 | 5   | 3                | 4   | 3              | 5   | 6                    | 37  |
| HBNCO         | Dark      | 14                 | 19  | 9                | 17  | 10             | 16  | 12                   | 14  |
|               | Light     | 6                  | 8   | 3                | 6   | 3              | 7   | 4                    | 5   |
| PBNCO         | Dark      | 19                 | 19  | 17               | 17  | 17             | 17  | 15                   | 15  |
|               | Light     | 8                  | 8   | 6                | 7   | 6              | 8   | 3                    | 5   |
| BNCO          | Dark      | 10                 | 10  | 9                | 19  | 14             | 16  | 17                   | 17  |
|               | Light     | 6                  | 7   | 5                | 4   | 7              | 8   | 7                    | 7   |
